# Supplementary material for: Stitching and registering highly multiplexed whole-slide images of tissues and tumors using ASHLAR
Source: PubMed Central journal article supplement (PMC9525007; doi:10.1093/bioinformatics/btac544), 2022-08-16
Supplement: btac544_supplementary_data.pdf [file btac544_supplementary_data.pdf]

# Figure S1: Registration accuracy comparison on t-CyCIF human colon

## A Registration error kernel density estimate

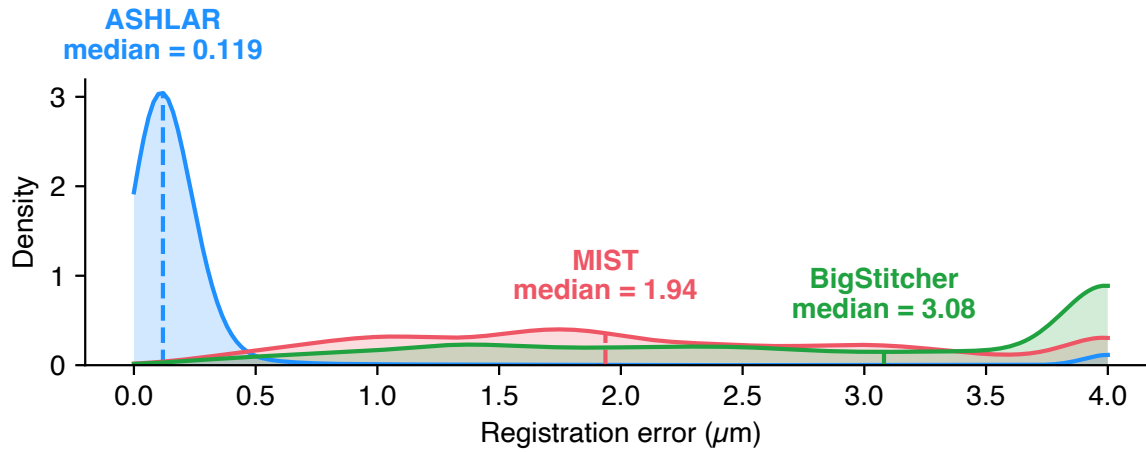

## B ASHLAR error field

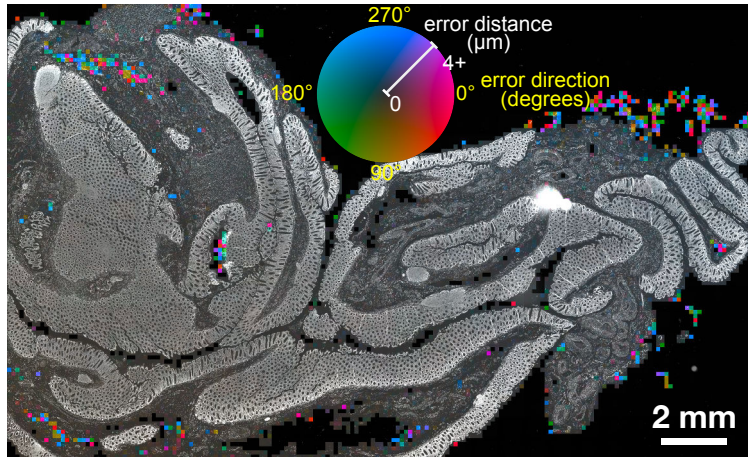

## C MIST error field

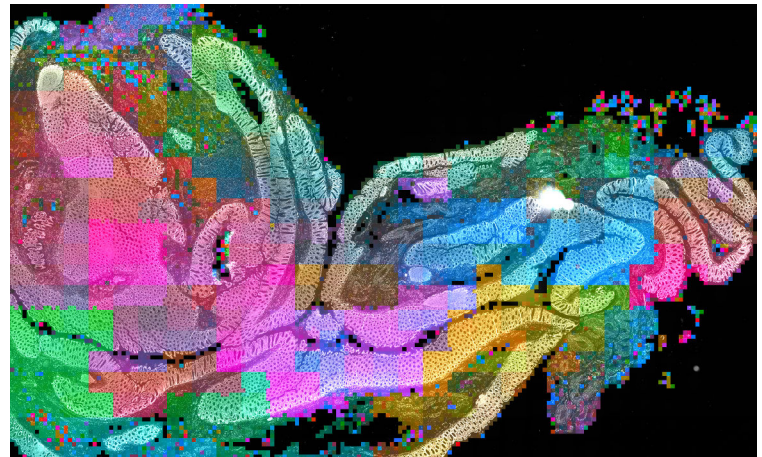

## D BigStitcher error field

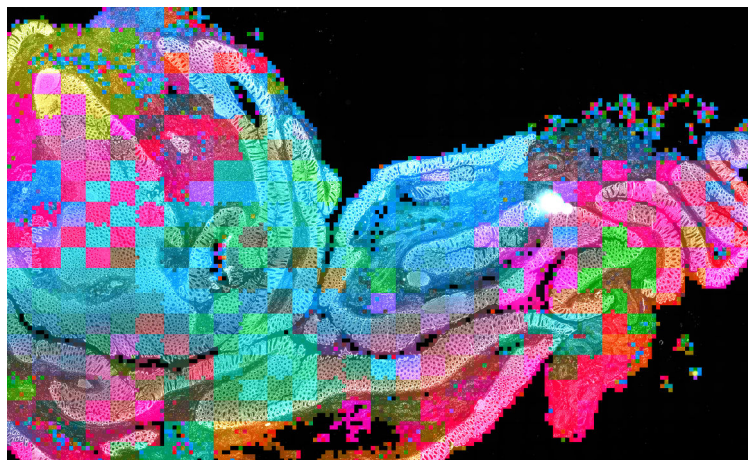

(A) Local registration error distance distributions for ASHLAR, MIST, and BigStitcher mosaic images of two t-CyCIF cycles of the human colon section described in the manuscript. Distances at the upper end in this plot as well as in panels B-D were clipped to 4  $\mu\text{m}$  to highlight the relevant data. (B-D) Heatmaps of local registration error for the three tools. Direction (hue) and magnitude (intensity) at 200-pixel resolution are overlaid on the nuclear stain image.

# Figure S2: Registration accuracy comparison on CODEX human tonsil

## A Registration error kernel density estimate

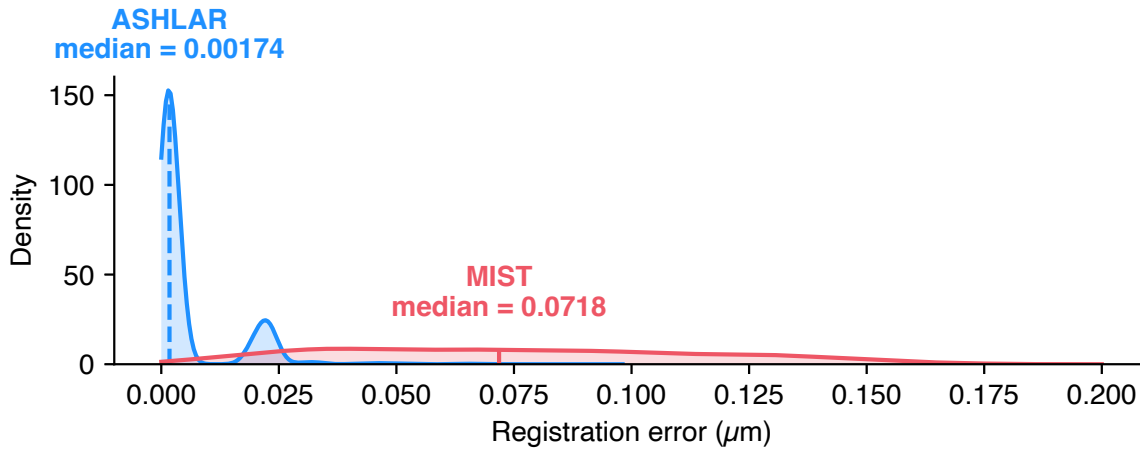

## B ASHLAR error field

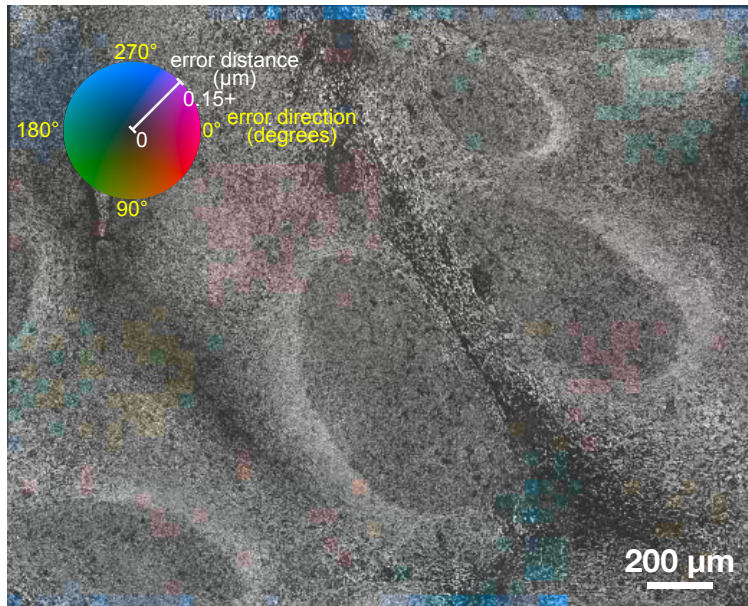

## C MIST error field

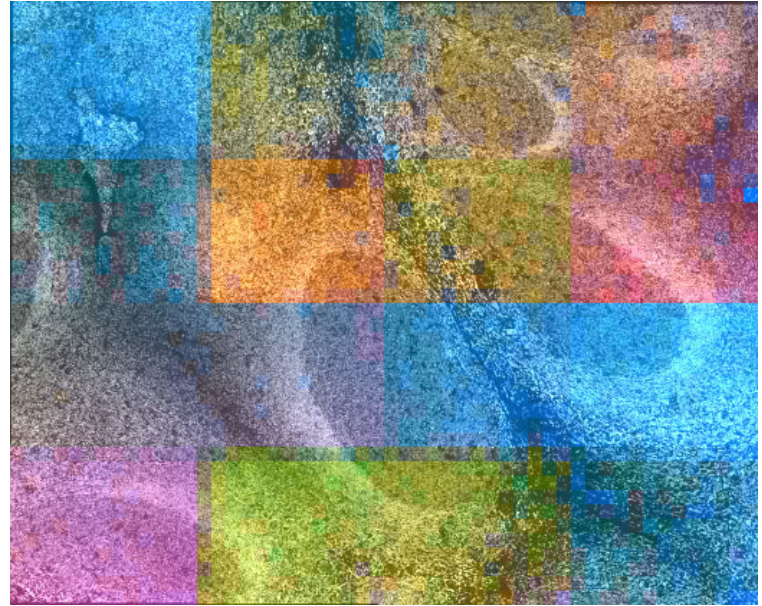

**(A)** Local registration error distance distributions for ASHLAR and MIST mosaic images of two CODEX cycles of a human tonsil section. Distances at the upper end in this plot as well as in panels B and C were clipped to 0.2  $\mu\text{m}$  to highlight the relevant data. **(B,C)** Heatmaps of local registration error for the two tools. Direction (hue) and magnitude (intensity) at 200-pixel resolution are overlaid on the nuclear stain image.



# Figure S3: Registration accuracy comparison on CODEX human spleen

## A Registration error kernel density estimate

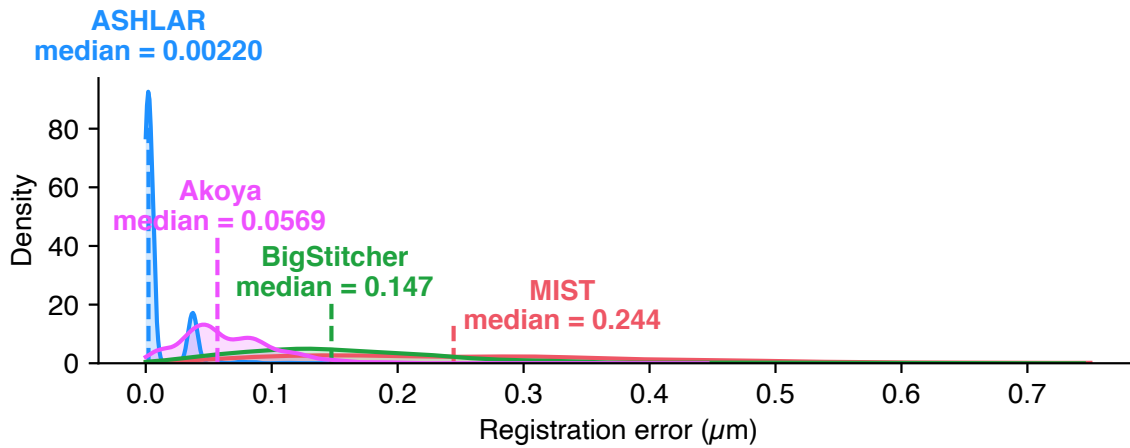

## B ASHLAR error field

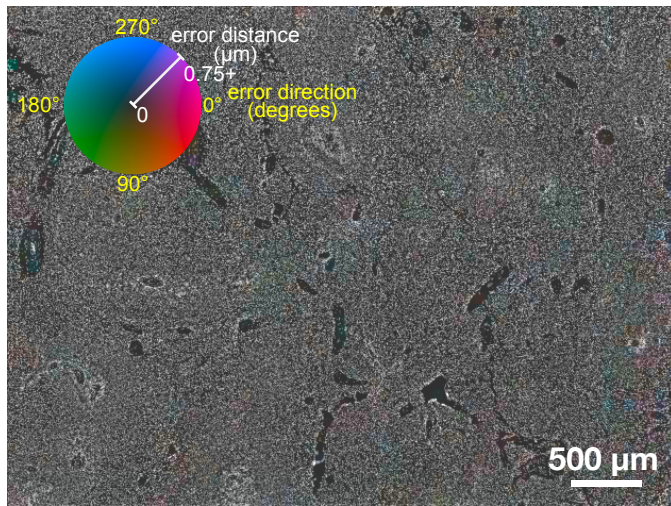

## C MIST error field

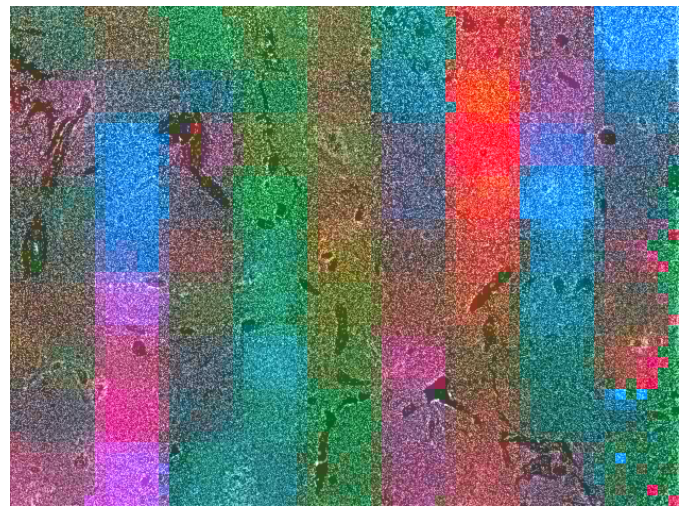

## D BigStitcher error field

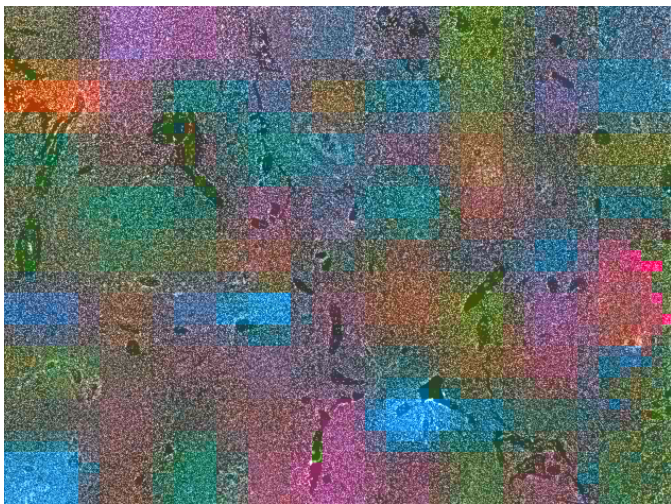

## E Akoya CODEX pipeline error field

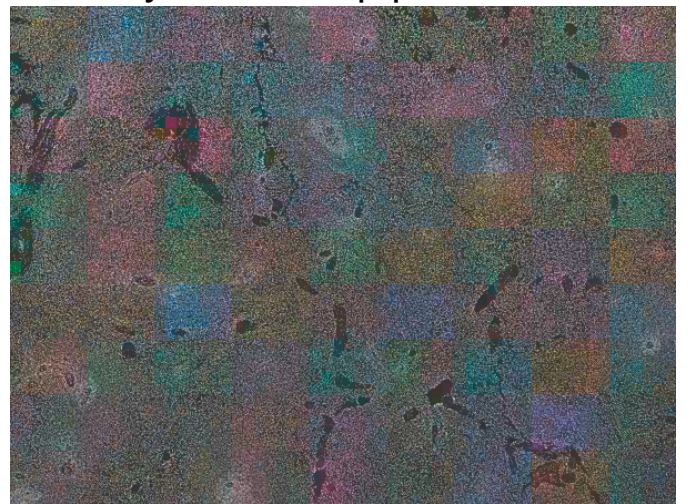

**(A)** Local registration error distance distributions for mosaic images from ASHLAR, MIST, BigStitcher, and the proprietary Akoya CODEX Processor of two CODEX cycles of a human spleen section. Distances at the upper end in this plot as well as in panels B-E were clipped to 0.75  $\mu\text{m}$  to highlight the relevant data. **(B-E)** Heatmaps of local registration error for the four tools. Direction (hue) and magnitude (intensity) at 200-pixel resolution are overlaid on the nuclear stain image.



# Figure S4: Registration accuracy comparison on CyCIF human TMA

## A Registration error kernel density estimate

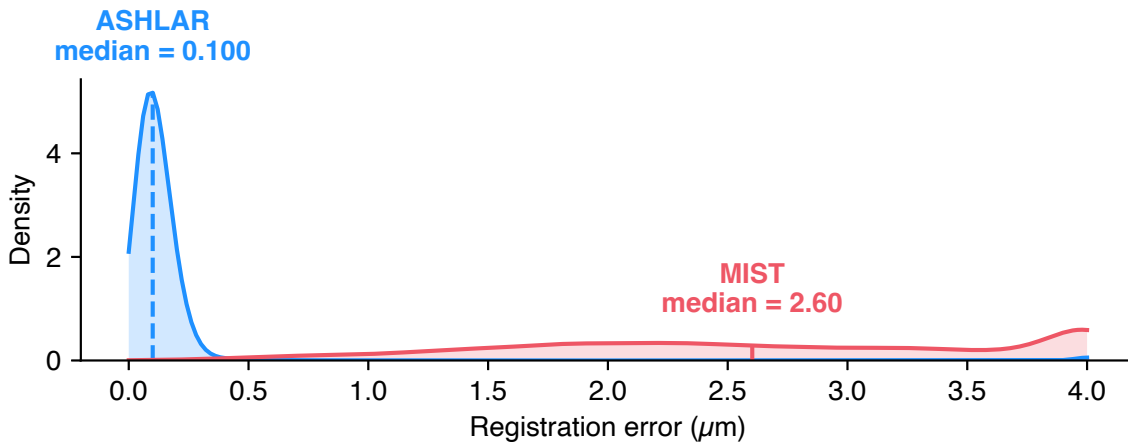

## B ASHLAR error field

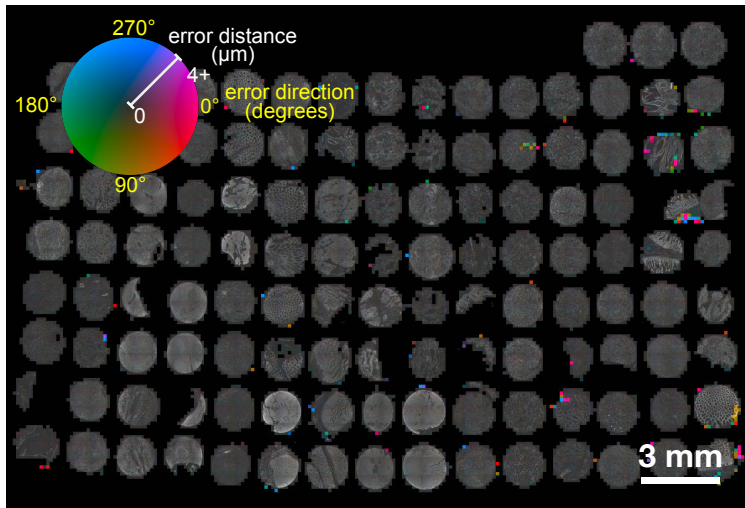

## C MIST error field

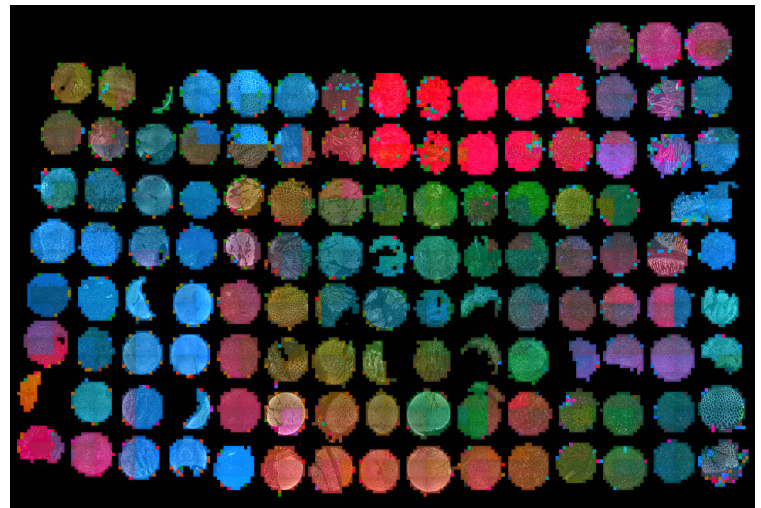

**(A)** Local registration error distance distributions for mosaic images from ASHLAR and MIST of two t-CyCIF cycles of a human tissue microarray (TMA). Distances at the upper end in this plot as well as in panels B and C were clipped to 4  $\mu\text{m}$  to highlight the relevant data. **(B,C)** Heatmaps of local registration error for the two tools. Direction (hue) and magnitude (intensity) at 200-pixel resolution are overlaid on the nuclear stain image.

# Figure S5: Registration accuracy comparison on CyCIF human tonsil

## A Registration error kernel density estimate

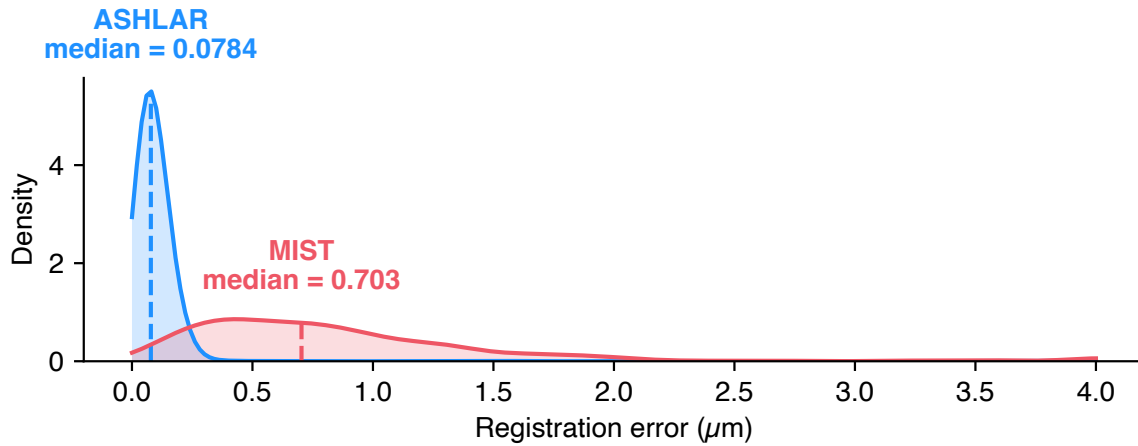

## B ASHLAR error field

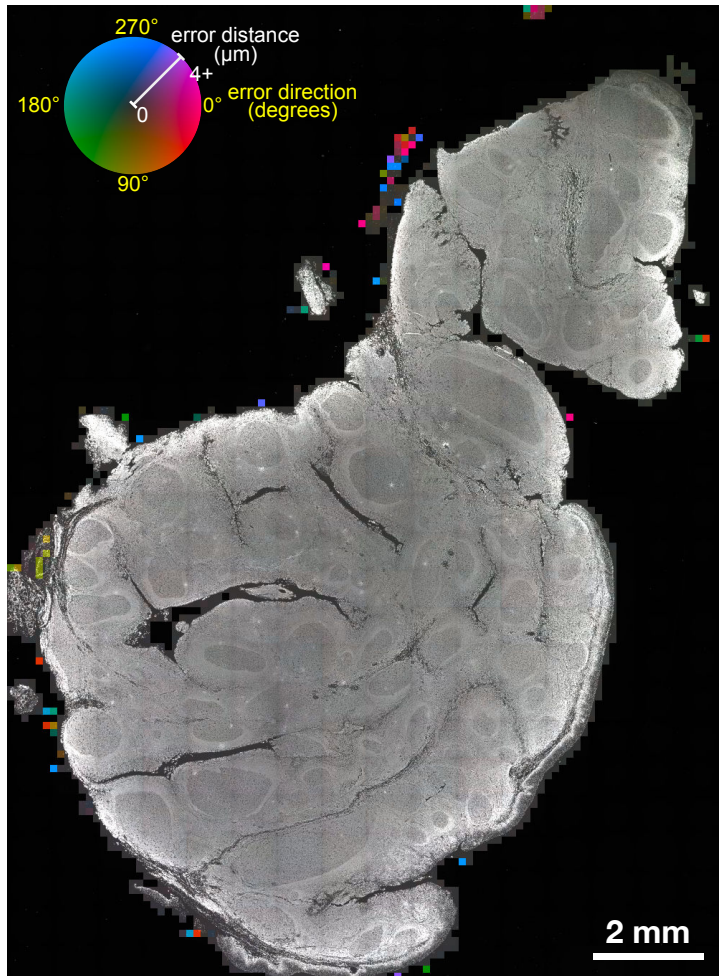

## C MIST error field

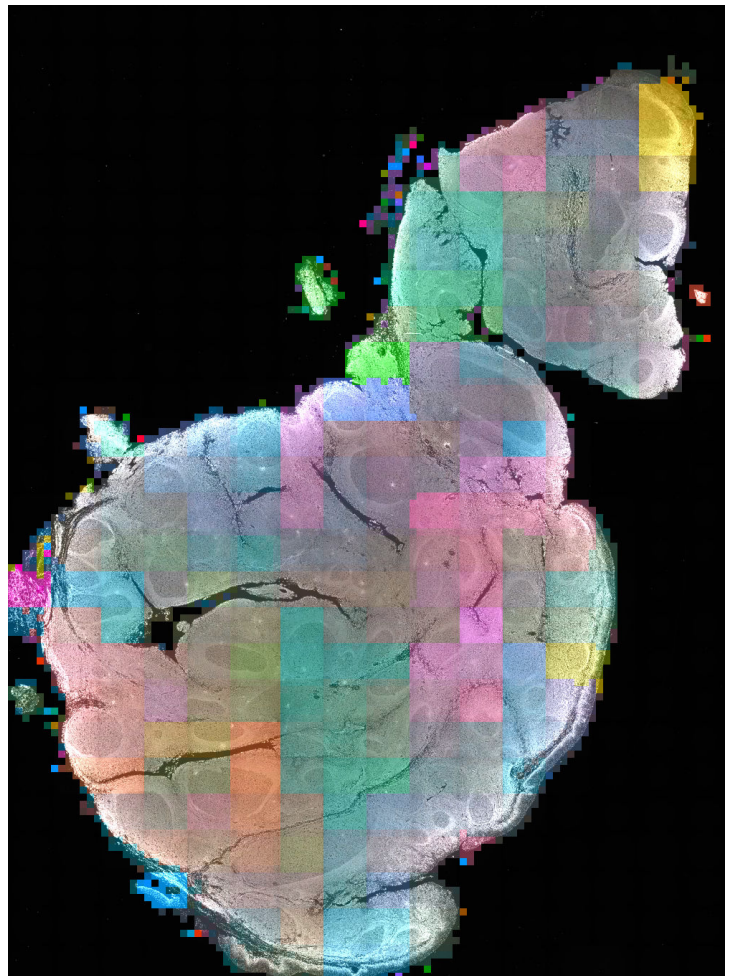

**(A)** Local registration error distance distributions for mosaic images from ASHLAR and MIST of two t-CyCIF cycles of a human tonsil section. Distances at the upper end in this plot as well as in panels B and C were clipped to  $4\ \mu\text{m}$  to highlight the relevant data. **(B,C)** Heatmaps of local registration error for the two tools. Direction (hue) and magnitude (intensity) at 200-pixel resolution are overlaid on the nuclear stain image.



**Figure S6: Registration accuracy of Zeiss Zen software on cyclic IF rat brain**

**A** Registration error kernel density estimate

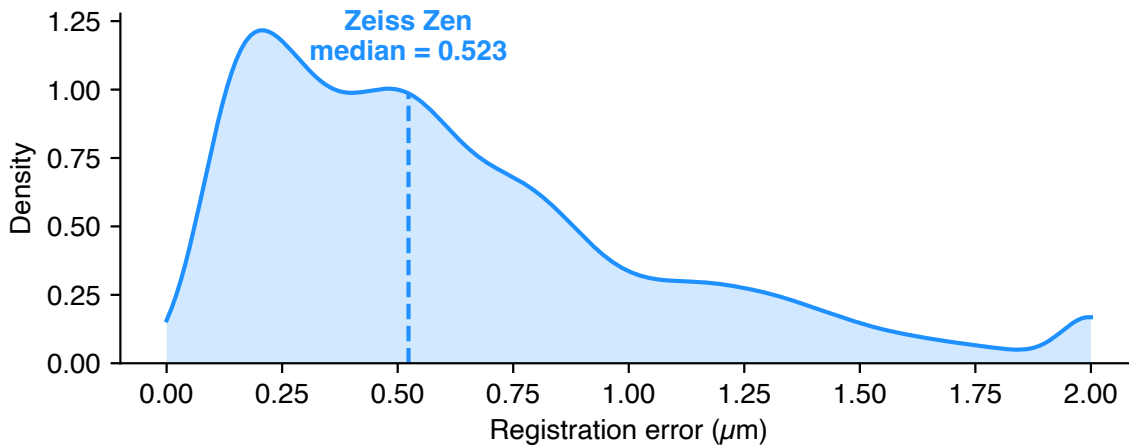

**B** Zeiss Zen error field

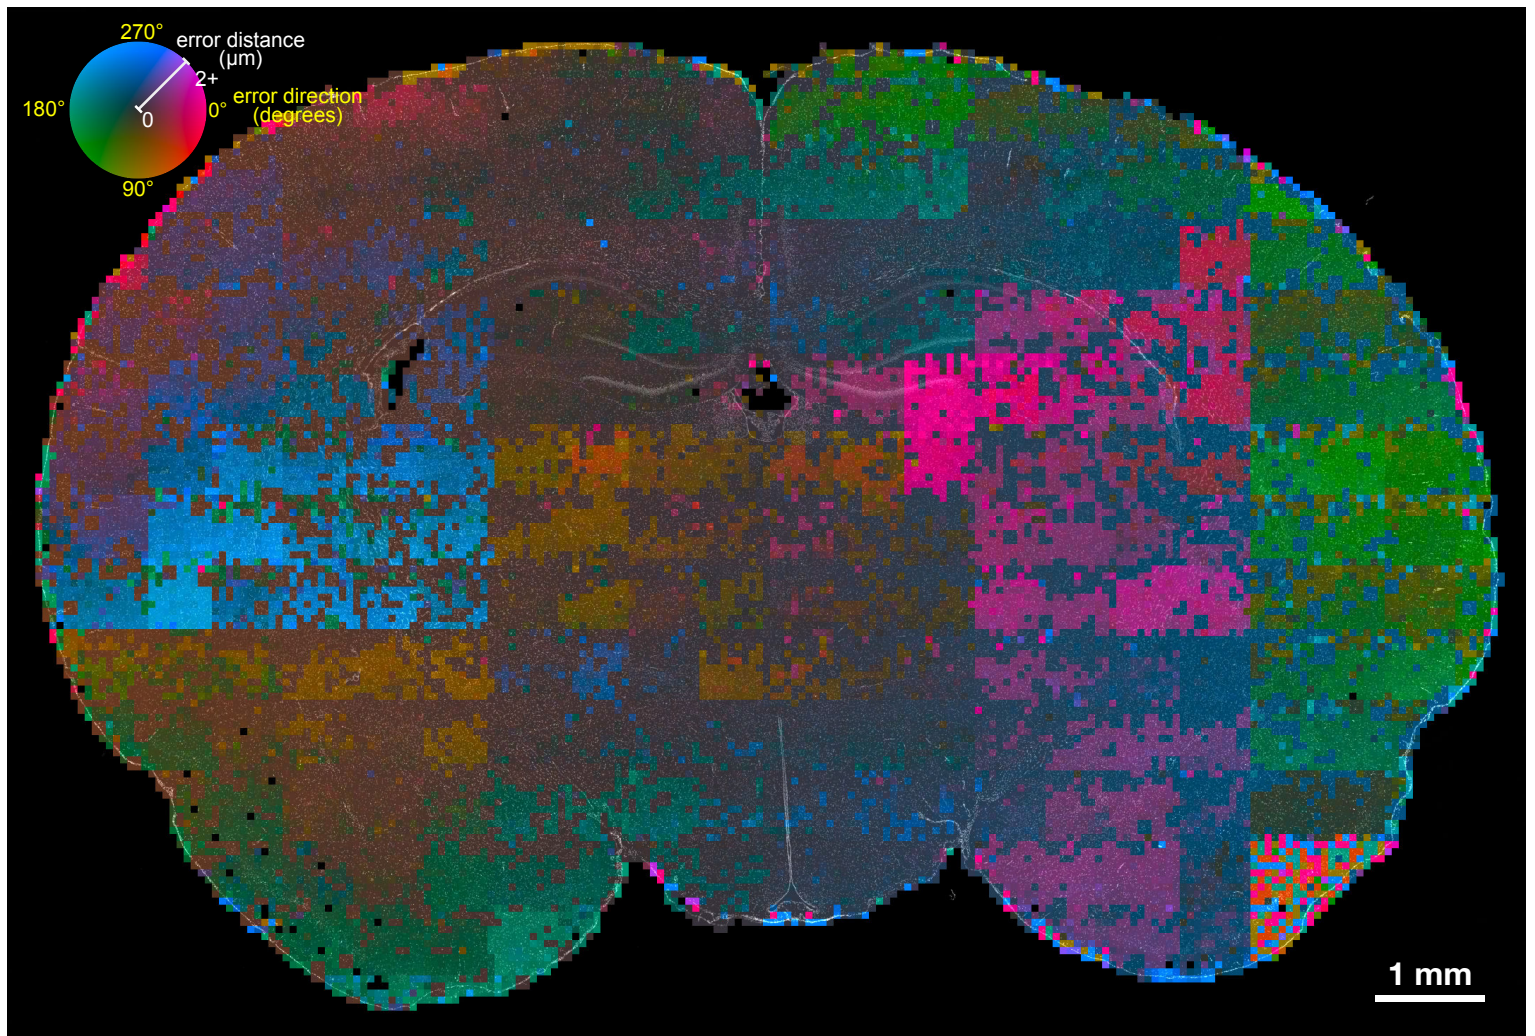

**(A)** Local registration error distance distributions for mosaic images from Zeiss Zen software of two cyclic IF cycles of a rat brain section. Distances at the upper end in this plot as well as in panel B were clipped to 2  $\mu\text{m}$  to highlight the relevant data. **(B)** Heatmap of local registration error. Direction (hue) and magnitude (intensity) at 200-pixel resolution are overlaid on the nuclear stain image.

**Figure S7: ASHLAR runtime vs. dataset size**

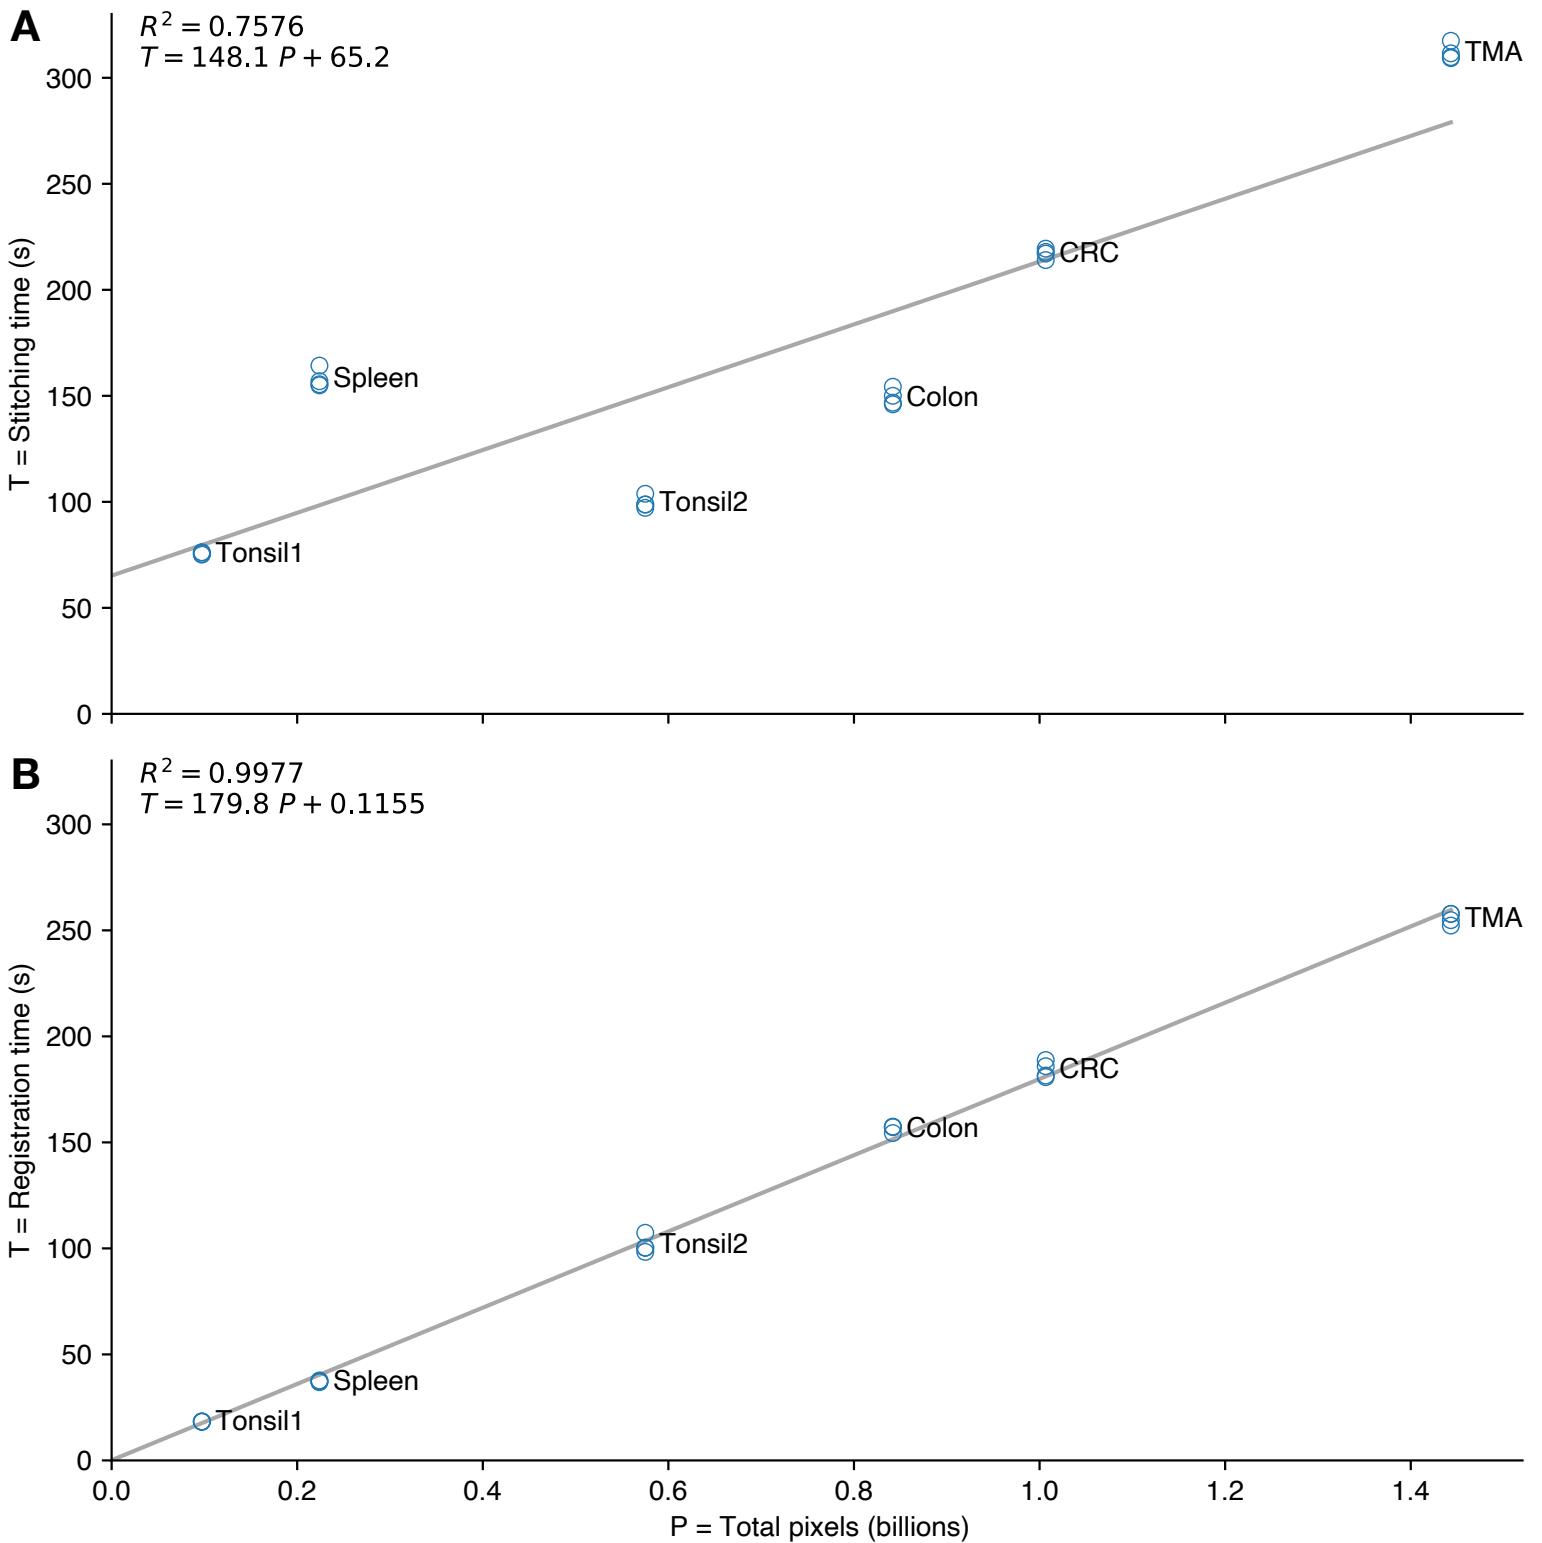

ASHLAR runtime for the stitching phase **(A)** and registration phase **(B)** vs. dataset size in total pixels per imaging cycle. Data points are shown for four runs of each of six datasets along with a linear fit. Datasets are summarized in **Supplementary Table 4**.

**SUPPLEMENTARY TABLE 1. Published image data stitched and registered using ASHLAR.**

| Authors             | Year | DOI                                        | Tissue type                                     | Tissue or organ of origin                       | WSI        | TMA       |
|---------------------|------|--------------------------------------------|-------------------------------------------------|-------------------------------------------------|------------|-----------|
| Schapiro et al      | 2021 | doi.org/10.1038/s41592-021-01308-y         | Normal tonsil, colorectal cancer                | Tonsil (2), colon (3), TMA (2)                  | 5          | 2         |
| Rashid et al        | 2021 | doi.org/10.1038/s41551-021-00789-8         | Lung carcinoma                                  | Lung (1),                                       | 1          | 0         |
| Duraiswamy et al    | 2021 | doi.org/10.1016/j.ccell.2021.10.008        | Ovarian cancer                                  | Ovarian (19)                                    | 19         | 0         |
| Krueger et al       | 2021 | doi.org/10.1109/TVCG.2021.3114786          | Colorectal cancer, lung adenocarcinoma          | Colon (2), lung (1)                             | 3          | 0         |
| Gaglia et al        | 2022 | doi.org/10.1101/2021.05.16.443704          | Breast carcinoma, ovarian carcinoma             | Breast (4), ovarian (0), TMA (6)                | 4          | 6         |
| Liu et al           | 2021 | doi.org/10.1038/s41591-021-01331-8         | Melanoma                                        | Skin (32)                                       | 32         | 0         |
| Keenan et al        | 2021 | dx.doi.org/10.1158%2F1078-0432.CCR-20-3089 | Breast carcinoma                                | Breast (12)                                     | 12         | 0         |
| Hemming et al       | 2021 | dx.doi.org/10.1158%2F1078-0432.CCR-20-3538 | Gastrointestinal stromal tumor                  | Gastrointestinal tract                          | 0          | 1         |
| Mehta et al         | 2021 | doi.org/10.1038/s43018-020-00148-7         | Breast carcinoma                                | Breast (16)                                     | 16         | 0         |
| Iorgulescu et al    | 2021 | doi.org/10.1158/1078-0432.CCR-20-2291      | Glioblastoma                                    | Brain                                           | 2          | 0         |
| Ringel et al        | 2021 | doi.org/10.1016/j.cell.2020.11.009         | Colorectal tumors                               | Colon (14)                                      | 14         | 0         |
| Chandrashekar et al | 2020 | doi.org/10.1126/science.abc4776            | Lung                                            | Lung (2)                                        | 2          | 0         |
| Hemming et al       | 2020 | doi.org/10.1200/po.19.00287                | Sarcoma                                         | Liver (2), sacrum (1)                           | 3          | 0         |
| Färkkilä et al      | 2020 | doi.org/10.1038/s41467-020-15315-8         | Ovarian cancer                                  | Ovarian (19)                                    | 19         | 0         |
| Gaglia et al        | 2020 | doi.org/10.1038/s41556-019-0458-3          | Colorectal tumors                               | Colon (1)                                       | 1          | 0         |
| Krueger et al       | 2019 | doi.org/10.1109/TVCG.2019.2934547          | Melanoma, breast carcinoma, lung adenocarcinoma | Skin (1), breast (1), lung (1)                  | 3          | 0         |
| Du et al            | 2019 | doi.org/10.1038/s41596-019-0206-y          | Normal tonsil, lung carcinoma                   | Tonsil (1), lung (1), lymph node (1), brain (1) | 4          | 0         |
| Nirmal et al        | 2022 | doi.org/10.1101/2021.05.23.445310          | Melanoma                                        | Skin (22)                                       | 22         | 0         |
| Lin et al           | 2022 | doi.org/10.1101/2021.03.31.437984          | Colorectal cancer                               | Colon (75), TMA (2)                             | 75         | 2         |
| Kalocsay et al      | 2021 | doi.org/10.1101/2020.10.14.339952          | Lung                                            | Lung (1)                                        | 1          | 0         |
| <b>Total</b>        |      |                                            | <b>12 tumor/tissue types</b>                    |                                                 | <b>238</b> | <b>11</b> |



**SUPPLEMENTARY TABLE 2. Microscopes Tested with ASHLAR.**

| <b>Instrument</b>        | <b>Type</b>         | <b>Datasets Collected<sup>1</sup></b> | <b>Objective</b> | <b>Field of View</b> | <b>Nominal Resolution<sup>2</sup></b> |
|--------------------------|---------------------|---------------------------------------|------------------|----------------------|---------------------------------------|
| RareCyte CyteFinder      | Slide scanner       | Colon, TMA, Tonsil2                   | 10X/0.3NA        | 1.66 x 1.40 mm       | 1.06 $\mu\text{m}$                    |
|                          |                     |                                       | 20X/0.75NA       | 0.83 x 0.7 mm        | 0.42 $\mu\text{m}$                    |
|                          |                     |                                       | 40X/0.6NA        | 0.42 x 0.35 mm       | 0.53 $\mu\text{m}$                    |
| RareCyte Orion           | Slide scanner       |                                       | 20X/0.75NA       | 0.66 x 0.66 mm       | 0.42 $\mu\text{m}$                    |
|                          |                     |                                       | 40X/0.95NA       | 0.33 x 0.33 mm       | 0.33 $\mu\text{m}$                    |
| GE IN Cell Analyzer 6000 | Slide scanning mode | CRC                                   | 10X/0.45NA       | 1.3 x 1.3 mm         | 0.70 $\mu\text{m}$                    |
|                          |                     |                                       | 20X/0.75NA       | 0.66 x 0.66 mm       | 0.42 $\mu\text{m}$                    |
|                          |                     |                                       | 40X/0.95NA       | 0.33 x 0.33 mm       | 0.33 $\mu\text{m}$                    |
|                          |                     |                                       | 60X/0.95NA       | 0.22 x 0.22 mm       | 0.33 $\mu\text{m}$                    |
| GE IN Cell Analyzer 6000 | Confocal mode       |                                       | 60X/0.95NA       | 0.22 x 0.22 mm       | 0.21 $\mu\text{m}$                    |
| Zeiss Axio Scan.Z1       | Slide scanner       |                                       | 10X/0.45NA       | 1.3 x 1.3 mm         | 0.70 $\mu\text{m}$                    |
|                          |                     |                                       | 20X/0.8NA        | 0.66 x 0.66 mm       | 0.40 $\mu\text{m}$                    |
| Zeiss Axio Observer.Z1   | Slide scanner       | Tonsill                               | 20X/0.8NA        | 0.83 x 0.66 mm       | 0.40 $\mu\text{m}$                    |
| Keyence BZ-X800          | Slide scanner       | Spleen                                | Keyence BZ-X800  | 0.72 x 0.54 mm       | 0.42 $\mu\text{m}$                    |

<sup>1</sup> See Supplementary Table 4 for details on the listed datasets.

<sup>2</sup> The nominal resolution ( $r$ ) was determined using the formulae: ( $r$ ) =  $0.61\lambda/\text{NA}$  for widefield or ( $r$ ) =  $0.4\lambda/\text{NA}$  for confocal microscopy ( $\lambda = 520$  nm). The actual resolution depends on optical properties, the thickness of the tissue section, and both the alignment and the quality of the optical components used.

**SUPPLEMENTARY TABLE 3. Antibodies used for CyCIF imaging of the human colon specimen.**

| Cycle Number | Channel Number | Target Name                   | RRID identifier | Fluorophore     | Clone       | Vendor                    | Catalog Number |
|--------------|----------------|-------------------------------|-----------------|-----------------|-------------|---------------------------|----------------|
| 1            | 1              | DNA                           | AB_10626776     | Hoechst 33342   | -           | Cell Signaling Technology | 4082S          |
| 1            | 2              | Rabbit-IgG                    | AB_2534114      | Alexa Fluor 488 | -           | Invitrogen                | A-11070        |
| 1            | 3              | Rat-IgG                       | AB_2535855      | Alexa Fluor 555 | -           | Invitrogen                | A-21434        |
| 1            | 4              | Mouse-IgG                     | AB_2535806      | Alexa Fluor 647 | -           | Invitrogen                | A-21237        |
| 2            | 5              | DNA                           | AB_10626776     | Hoechst 33342   | -           | Cell Signaling Technology | 4082S          |
| 2            | 6              | Na/K ATPase                   | AB_2798866      | -               | D4Y7E       | Cell Signaling Technology | 23565          |
| 2            | 7              | CD3                           | AB_2889189      | -               | CD3-12      | Abcam                     | ab11089        |
| 2            | 8              | Cellular tumor antigen p53    | AB_2206626      | -               | DO7         | Dako                      | M7001          |
| 3            | 9              | DNA                           | AB_10626776     | Hoechst 33342   | -           | Cell Signaling Technology | 4082S          |
| 3            | 10             | Antigen Ki67                  | AB_2687824      | Alexa Fluor 488 | D3B5        | Cell Signaling Technology | 11882          |
| 3            | 11             | Pan-cytokeratin               | AB_11217482     | eFluor 570      | AE1/AE3     | eBioscience/Thermo Fisher | 41-9003-80     |
| 3            | 12             | Aortic smooth muscle actin    | AB_2574361      | eFluor 660      | 1A4         | eBioscience/Thermo Fisher | 50-9760-80     |
| 4            | 13             | DNA                           | AB_10626776     | Hoechst 33342   | -           | Cell Signaling Technology | 4082S          |
| 4            | 14             | CD8a                          | AB_2574412      | Alexa Fluor 488 | AMC908      | eBioscience/Thermo Fisher | 53-0008-80     |
| 4            | 15             | CD4                           | AB_2573601      | eFluor 570      | N1UG0       | eBioscience/Thermo Fisher | 41-2444-80     |
| 4            | 16             | CD45                          | AB_493034       | Alexa Fluor 647 | HI30        | BioLegend                 | 304020         |
| 5            | 17             | DNA                           | AB_10626776     | Hoechst 33342   | -           | Cell Signaling Technology | 4082S          |
| 5            | 18             | CD45RO                        | AB_528823       | Alexa Fluor 488 | UCHL1       | BioLegend                 | 304212         |
| 5            | 19             | CD11c                         |                 | Alexa Fluor 555 | D3V1E       | Cell Signaling Technology | 77882BC        |
| 5            | 20             | PD-L1                         | AB_2728832      | Alexa Fluor 647 | E1L3N       | Cell Signaling Technology | 15005          |
| 6            | 21             | DNA                           | AB_10626776     | Hoechst 33342   | -           | Cell Signaling Technology | 4082S          |
| 6            | 22             | CD68                          | AB_2798886      | Alexa Fluor 488 | D4B9C       | Cell Signaling Technology | 24850          |
| 6            | 23             | FoxP3                         | AB_2573608      | eFluor 570      | 236A/E7     | eBioscience/Thermo Fisher | 41-4777-80     |
| 6            | 24             | PD-1                          | AB_2728811      | Alexa Fluor 647 | EPR4877(2)  | Abcam                     | ab201825       |
| 7            | 25             | DNA                           | AB_10626776     | Hoechst 33342   | -           | Cell Signaling Technology | 4082S          |
| 7            | 26             | CD20                          | AB_10734358     | Alexa Fluor 488 | L26         | eBioscience/Thermo Fisher | 53-0202-82     |
| 7            | 27             | Phospho-histone H3.1 (Ser10)  | AB_10694639     | Alexa Fluor 555 | D2C8        | Cell Signaling Technology | 3475S          |
| 7            | 28             | CD31                          | AB_2857973      | Alexa Fluor 647 | EPR3094     | Abcam                     | ab218582       |
| 8            | 29             | DNA                           | AB_10626776     | Hoechst 33342   | -           | Cell Signaling Technology | 4082S          |
| 8            | 30             | E-cadherin                    | AB_10691457     | Alexa Fluor 488 | 24E10       | Cell Signaling Technology | 3199           |
| 8            | 31             | Vimentin                      | AB_10859896     | Alexa Fluor 555 | D21H3       | Cell Signaling Technology | 9855           |
| 8            | 32             | Catenin beta-1                | AB_10691326     | Alexa Fluor 647 | L54E2       | Cell Signaling Technology | 4627           |
| 9            | 33             | DNA                           | AB_10626776     | Hoechst 33342   | -           | Cell Signaling Technology | 4082S          |
| 9            | 34             | CD163                         | AB_2889155      | Alexa Fluor 488 | EPR14643-36 | Abcam                     | ab218293       |
| 9            | 35             | Histone H3.1                  | AB_2799990      | phycoerythrin   | D1H2        | Cell Signaling Technology | 82241          |
| 9            | 36             | Phospho-Histone H2AX (Ser139) | AB_2114994      | Alexa Fluor 647 | 2F3         | BioLegend                 | 613407         |



**SUPPLEMENTARY TABLE 4. Description of datasets analyzed.**

| Name    | Figures | Tile Dimensions | Grid Dimensions       | Pixel Size (µm) | Method          | Instrument             | Tissue                          | Source                                            | Location                                                                                                                          |
|---------|---------|-----------------|-----------------------|-----------------|-----------------|------------------------|---------------------------------|---------------------------------------------------|-----------------------------------------------------------------------------------------------------------------------------------|
| Colon   | 4,5,S1  | 1280 x 1080     | 29 x 21               | 0.65            | t-CyCIF         | RareCyte Cytfinder     | human colon                     | Published as part of this work                    | <a href="https://dx.doi.org/10.7303/syn25826362">https://dx.doi.org/10.7303/syn25826362</a>                                       |
| CRC     | 6B      | 2048 x 2048     | 15 x 16               | 0.325           | H&E brightfield | GE INCell 6000         | human colorectal adenocarcinoma | Unpublished                                       |                                                                                                                                   |
| Tonsil1 | S2      | 2752 x 2208     | 4 x 4                 | 0.227           | CODEX           | Zeiss Axio Observer Z1 | human tonsil                    | Synapse (MCMICRO exemplar data)                   | <a href="https://www.synapse.org/#!Synapse:syn24849819">https://www.synapse.org/#!Synapse:syn24849819</a>                         |
| Spleen  | S3      | 1920 x 1440     | 9 x 9                 | 0.38            | CODEX           | Keyence BZ-X800        | human spleen                    | HuBMAP (University of Florida TMC / J. P. Aponte) | <a href="https://dx.doi.org/10.35079/HBM355.JDLK.244">https://dx.doi.org/10.35079/HBM355.JDLK.244</a>                             |
| TMA     | S4      | 1280 x 1080     | 36 x 29               | 0.65            | t-CyCIF         | RareCyte Cytfinder     | human, various                  | Synapse (EMIT exemplar data)                      | <a href="https://www.synapse.org/#!Synapse:syn22345748/wiki/609239">https://www.synapse.org/#!Synapse:syn22345748/wiki/609239</a> |
| Tonsil2 | S5      | 1280 x 1080     | 15 x 25               | 0.65            | t-CyCIF         | RareCyte Cytfinder     | human tonsil                    | Unpublished                                       |                                                                                                                                   |
| Brain2  | S6      | 2048 x 2048     | 22 x 15 (approximate) | 0.325           | cyclic IF       | Zeiss Axio Imager Z2   | rat brain                       | Figshare (Maric et al.)                           | <a href="https://doi.org/10.6084/m9.figshare.13731585.v1">https://doi.org/10.6084/m9.figshare.13731585.v1</a>                     |
